# Supplementary material for: A recurrent regulatory change underlying altered expression and Wnt response of the stickleback armor plates gene EDA
Source: eLife. 2015 Jan 28;4:e05290. doi: 10.7554/eLife.05290 (PMC4384742; doi:10.7554/eLife.05290)
Supplement: Supplementary file 1. — EDA haplotypes found in typical marine and freshwater populations, and in rare heterozygous carrier fish from Alaska. Previous studies have identified characteristic base pair positions that differentiate the most abundant EDA haplotypes present in marine and freshwater populations. The position of these SNPs in the EDA region are shown, along with the exon number in which they occur, the nature of the mutation (S: synonymous change; N: non-synonymous change; Reg: regulatory change), the SNP number assigned in previous studies, and the characteristic alleles that are found in 10 different completely-plated marine (red) and 14 different low-plated freshwater (blue) populations (top two haplotype rows, see Colosimo et al., 2005). We amplified the genomic region surrounding the new T → G regulatory mutation identified in the current study, and found that 12 of 263 completely plated migratory fish from Rabbit Slough, Alaska (RABS) were heterozygous for the T → G change (minor allele frequency: 2.3%). Analysis of flanking positions suggests that these carrier fish are heterozygous for larger or smaller haplotypes at the EDA locus, or are marine-like at all positions except for the T → G change like NAKA. The six indicated SNPs correspond to positions chrIV: 12808303, 12808630, 12811481, 12811933, 12813328, 12813394 in the stickleback genome assembly (Jones et al., 2012). DOI: http://dx.doi.org/10.7554/eLife.05290.010 [file elife05290s001.xlsx]

## Sheet: Sheet1
			EDA		Intergenic	TNFSF13B
		Exon:	3	4		2	6	6
		Type of Change:	N	S	Reg	N	S	N
		Colosimo et al. SNP:	5	6	New	7	8	9
	10 Complete Populations		C	G	T	G	C	C
	14 Low Populations		T	A	G	C	T	T
	1 RABS heterozygote		C/T	G/A	T/G	G/C	C/T	C/T
	3 RABS heterozygotes		C	G	T/G	G/C	C	C
	8 RABS heterozygotes		C	G	T/G	G	C	C
